# Supplementary material
Source: PubMed Central journal article supplement (PMC4007768)
Supplement: supp_127.3.686_JCS145037.pdf [file supp_127.3.686_JCS145037.pdf]

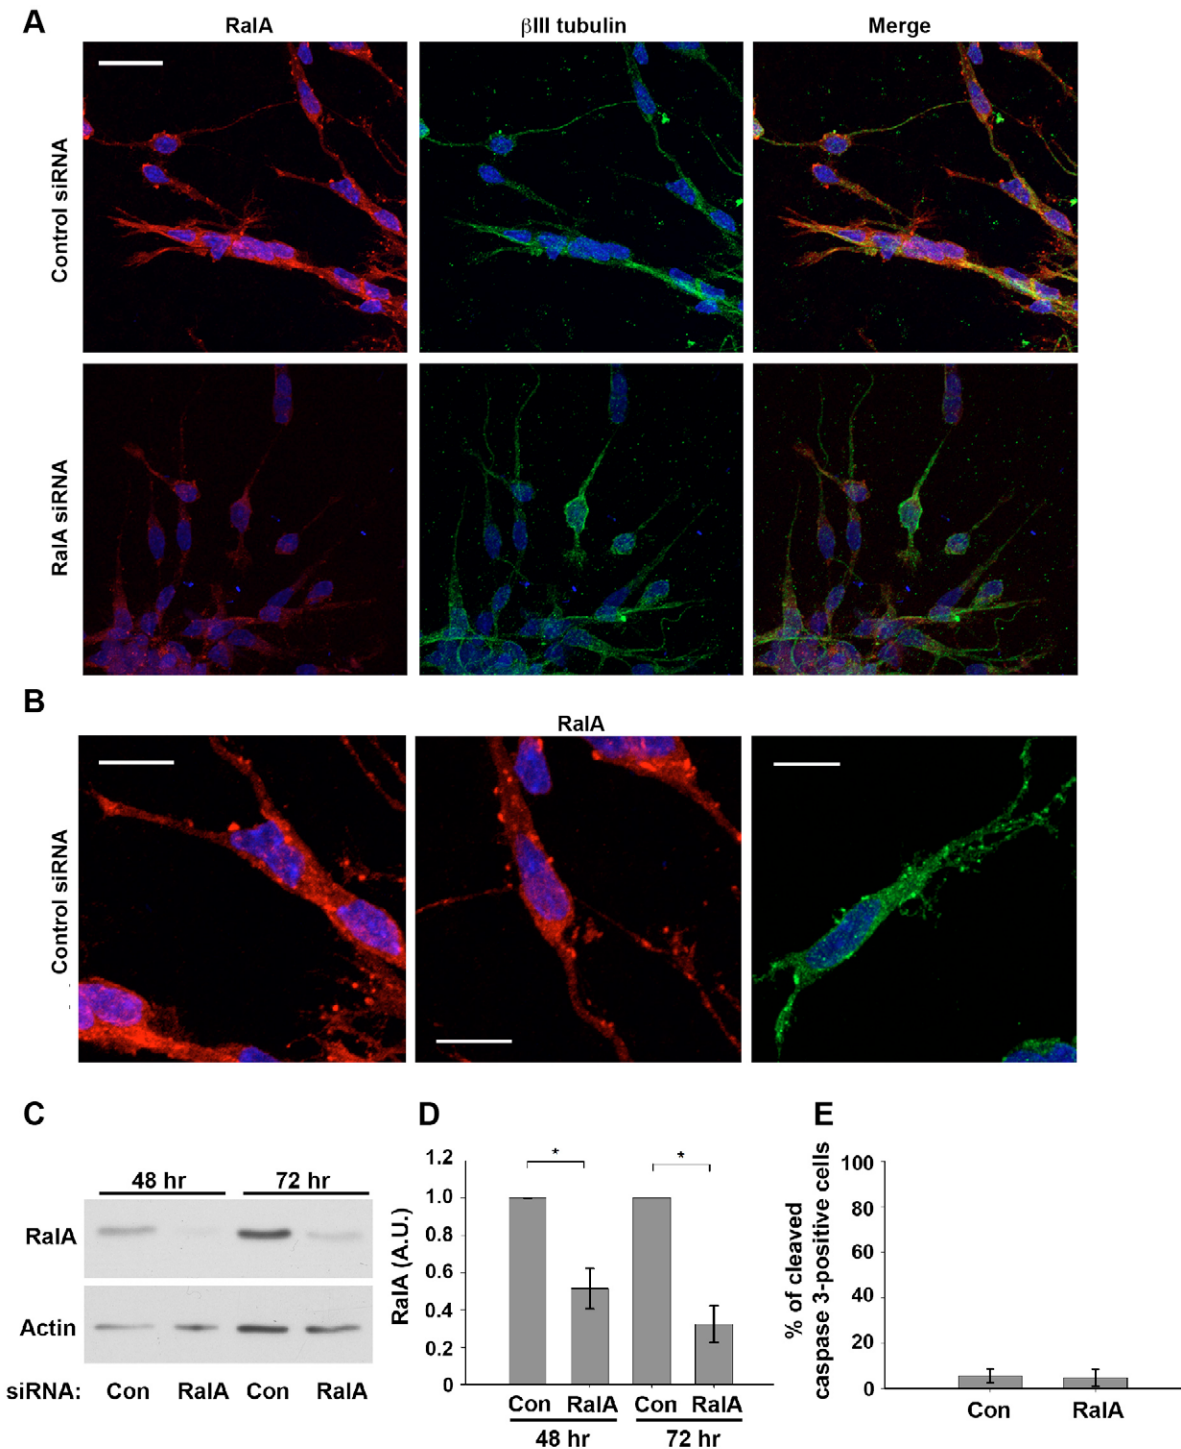

**Figure S1, Das et al**

**Fig. S1. RalA depletion in RMS neuroblasts.** (A) Rat RMS neuroblasts were nucleofected with a control or RalA siRNA oligo and re-aggregated into clusters, embedded in Matrigel 48 h later and allowed to migrate for 24 h before immunostaining for RalA (red) and  $\beta$  III tubulin (green). Cell nuclei (blue) are visualized by Hoechst dye. RalA expression was significantly reduced by the RalA siRNA oligo. Bar, 20  $\mu$ m. (B) High magnification pictures showing reproducible RalA punctate distribution (red or green) in neuroblasts nucleofected with control siRNA in two different experiments. Cell nuclei (blue) are visualized by Hoechst. Bars, 10  $\mu$ m. (C) Representative western blot showing reduced expression of RalA at both 48 and 72 h after nucleofection with a RalA siRNA oligo compared to a control (Con) oligo. (D) Densitometric western blot analysis showing significant RalA reduction 48 and 72 h after RalA siRNA nucleofection. Mean  $\pm$  SEM; \* $p$  < 0.05;  $n$  = 4 independent experiments. (E) Quantification of cleaved caspase 3-positive cells after nucleofection with control or RalA siRNA shows no significant difference in the percentage of cells undergoing apoptosis. Mean  $\pm$  SEM;  $n$  = 3 independent experiments.

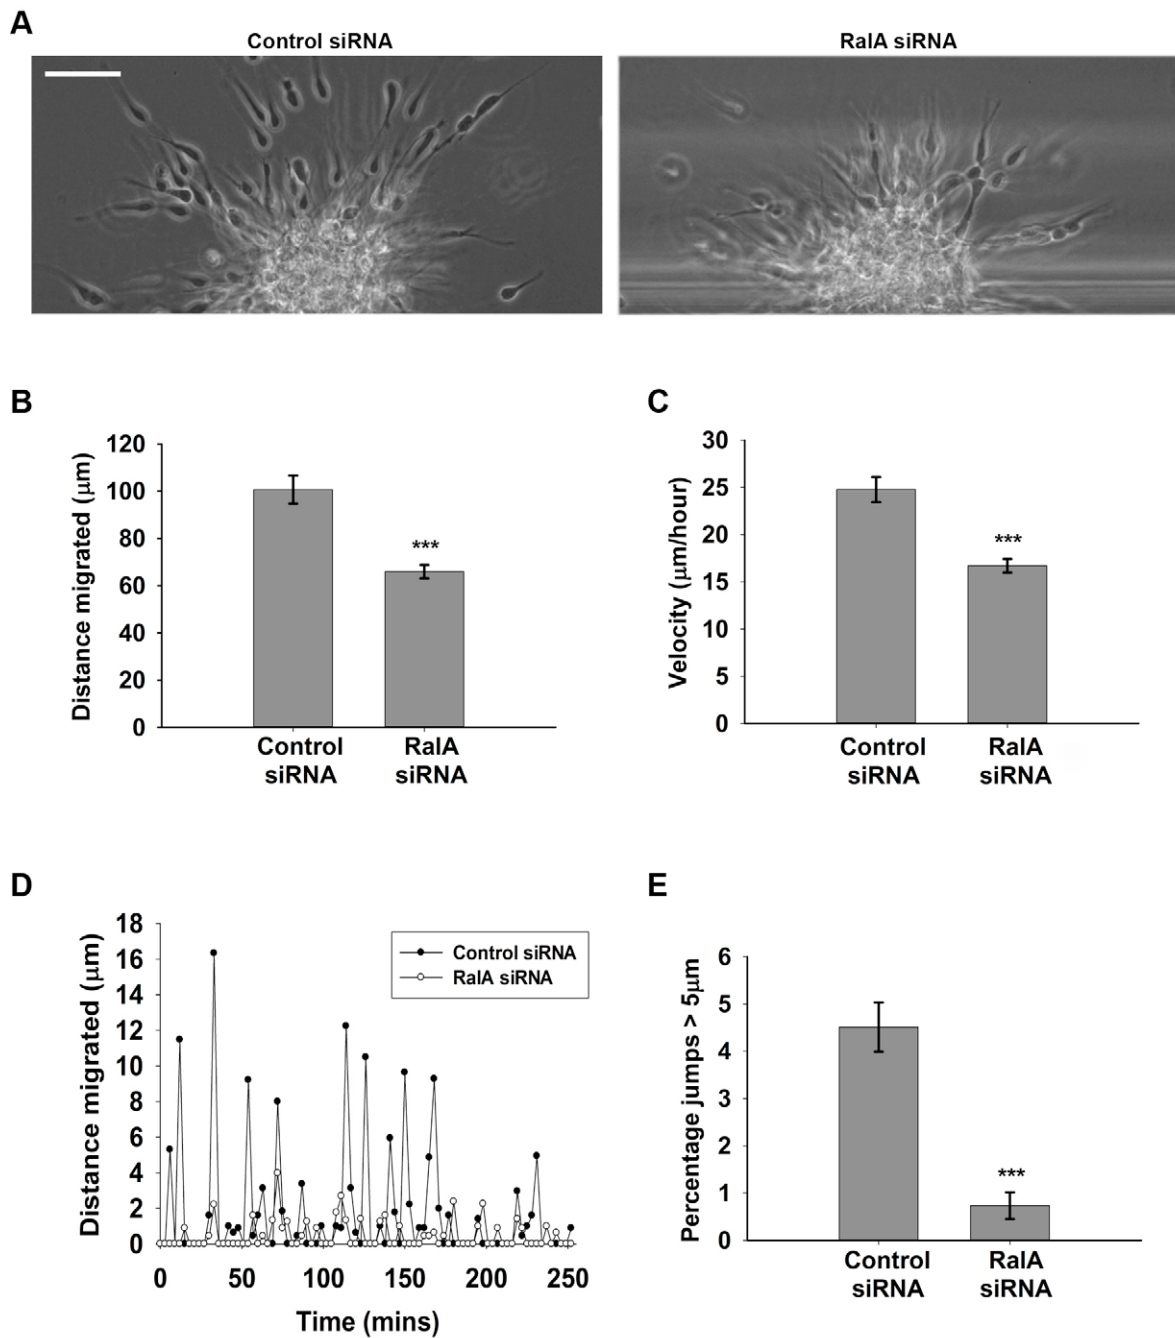

**Figure S2, Das et al**

**Fig. S2. *In vitro* RalA depletion impairs neuroblast migration.** (A) Snapshots of control and RalA-depleted rat neuroblasts migrating in Matrigel taken 55 h after siRNA nucleofection. Depleting RalA decreased neuroblast migration distance (B) and velocity (C). (D) Representative nuclear displacement traces for control and RalA-depleted neuroblasts. (E) RalA knockdown significantly decreased the percentage of large nuclear jumps. Mean  $\pm$  SEM; \*\*\* $p < 0.001$ ; for each condition 80 cells were tracked from 3 independent experiments.

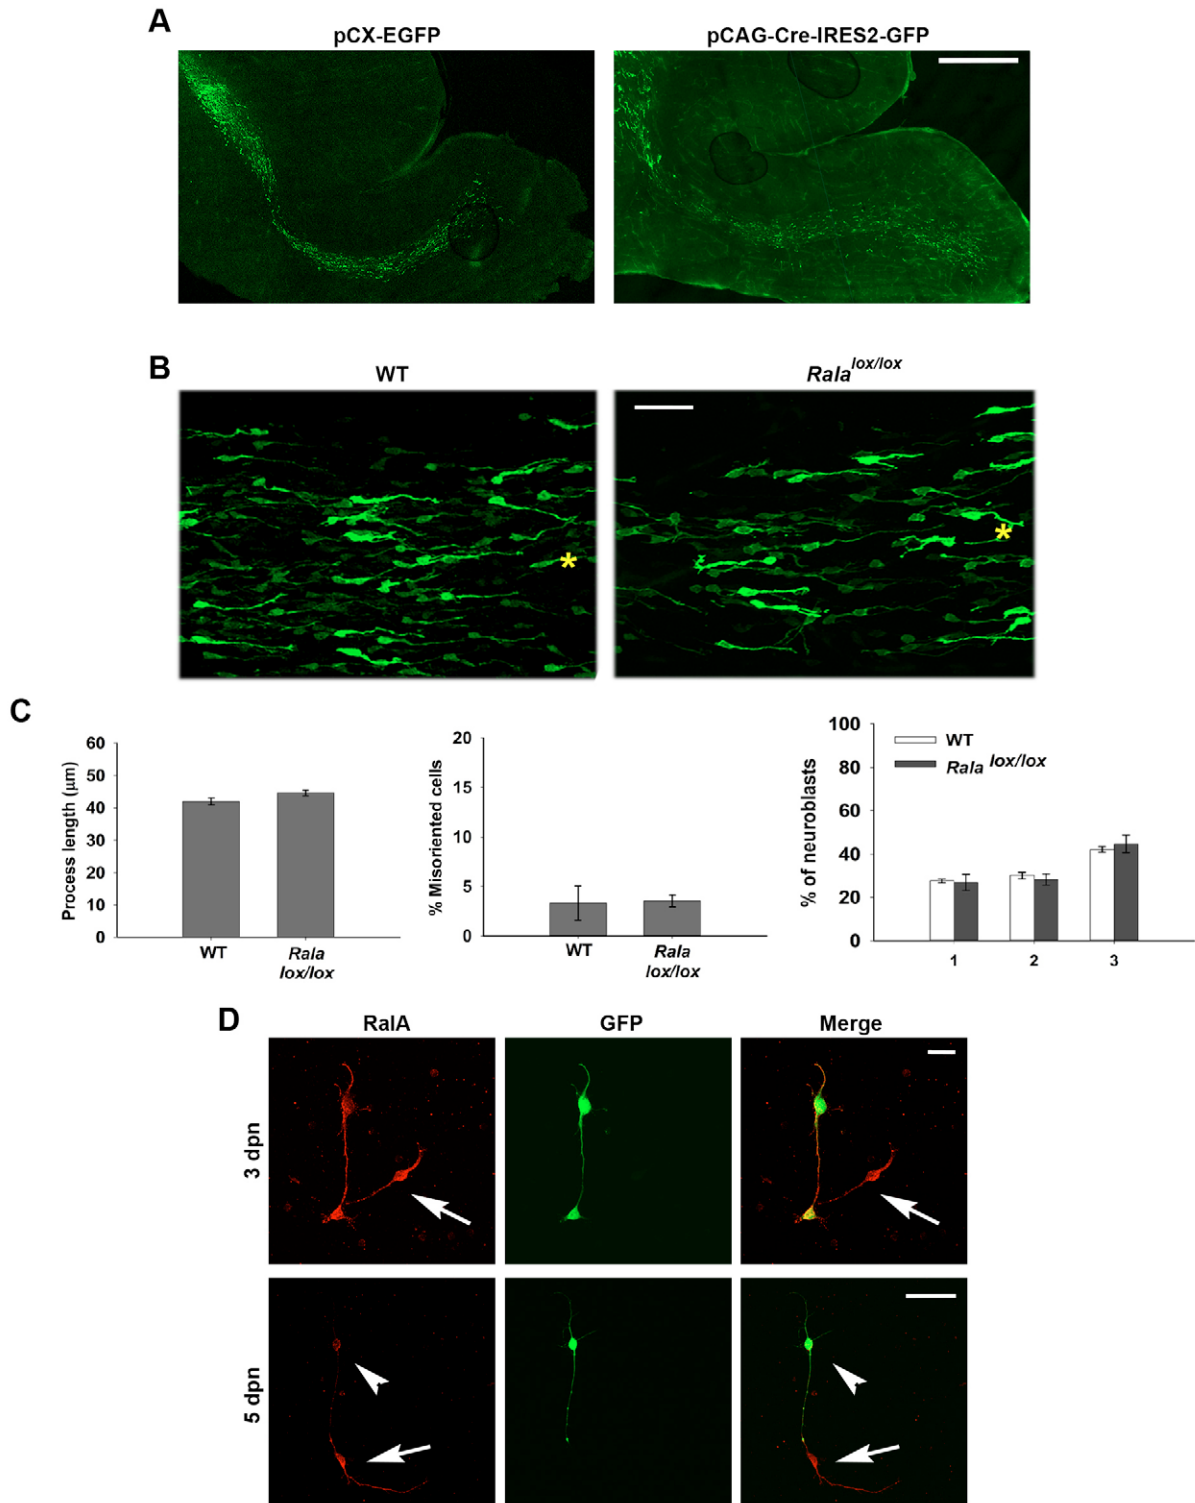

**Figure S3, Das et al**

**Fig. S3. Cre-induced genetic deletion of *Rala*.** (A) Confocal projections of sagittal slices from wt mouse brains immunostained for GFP 5 d after *in vivo* electroporation of pCX-EGFP or pCAG-Cre-IRES2-EGFP. Cre expression *per se* does not affect neuroblast morphology and migration. Bar, 500  $\mu$ m. (B) wt and *Rala*<sup>lox/lox</sup> mice were electroporated with pCX-EGFP. Representative confocal projections of fixed RMS sections showing GFP-labeled neuroblasts 5 d after electroporation. Yellow asterisks indicate relative position of the OB. (C) There was no significant difference in process length, orientation, and migration of neuroblasts between wt and *Rala*<sup>lox/lox</sup> mice. Mean  $\pm$  SEM; n = 6 brains for wt and *Rala*<sup>lox/lox</sup>. (D) Neuroblasts from P7 *Rala*<sup>lox/lox</sup> mouse pups were nucleofected with pCAG-Cre-IRES2-GFP, fixed 3 or 5 d later (3dpn/5dpn) and immunostained for RaLA (red) and GFP (green). Downregulation of RaLA expression is visible in GFP-positive cells only at 5 dpn (arrowhead), while GFP-negative cells retain strong RaLA immunoreactivity (arrows). Bars, (3 dpn) 20  $\mu$ m; (5 dpn) 50  $\mu$ m.

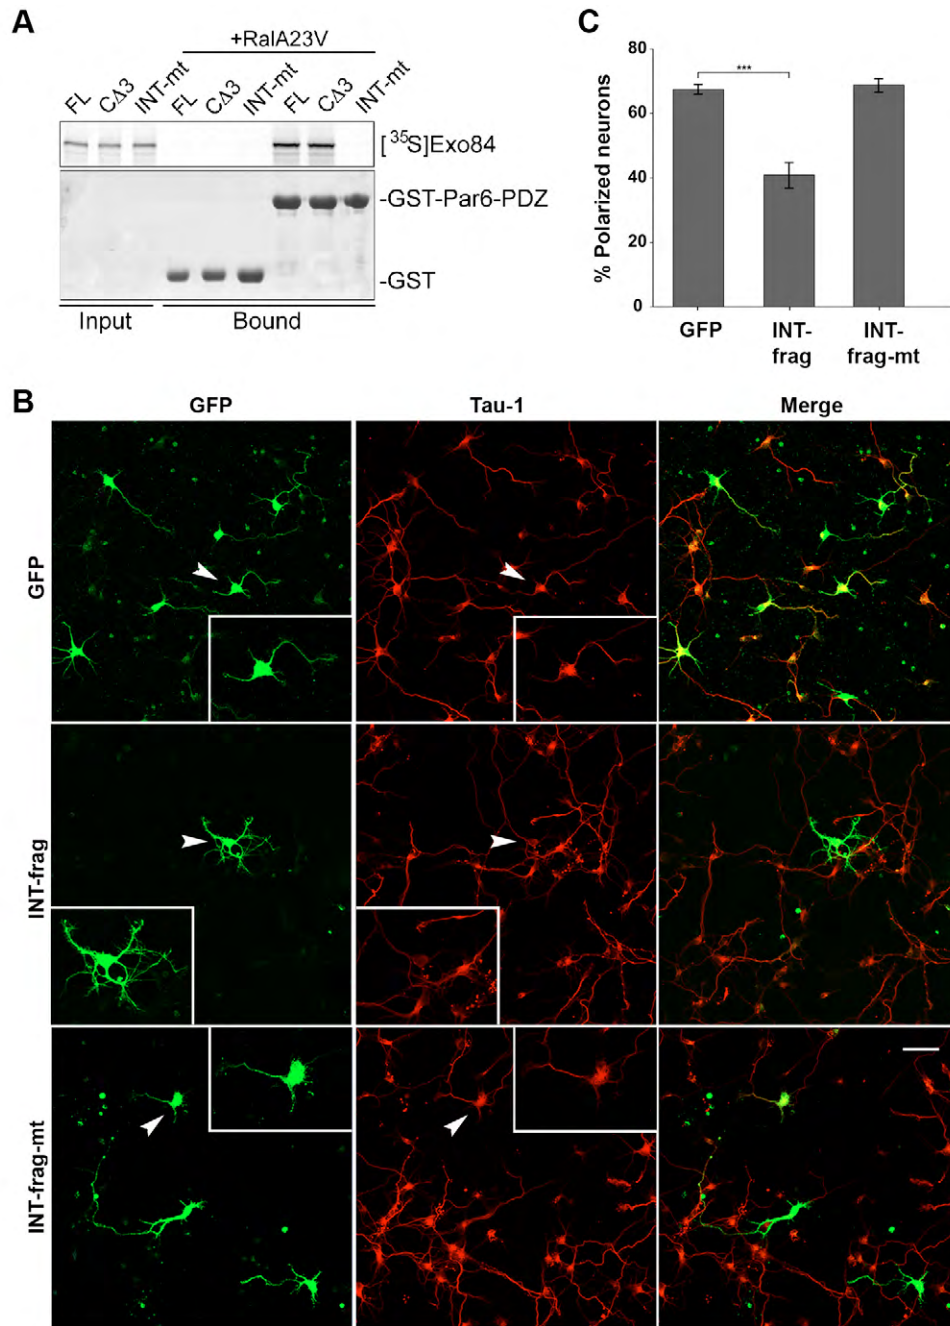

**Figure S4, Das et al**

**Fig. S4. Disrupting the Exo84-Par6 interaction affects neuronal polarization.** (A) The internal PDZ-binding motif of Exo84 is required for RalA-promoted interaction between Exo84 and Par6. *In vitro* translated full length Exo84 (FL), Exo84 lacking the C-terminal PDZ binding domain (CA $\Delta$ 3) and Exo84 mutated in the internal PDZ-binding motif (INT-mt) were incubated with GST-Par6-PDZ in presence of RalA23V. Both Exo84FL and Exo84CA $\Delta$ 3 bound to GST-Par6-PDZ, whereas Exo84INT-mt was unable to interact with Par6-PDZ. The lower panel is a Coomassie blue-stained gel showing the amounts of GST-Par6-PDZ and GST (as control). (B) Embryonic rat cortical neurons were nucleofected with plasmids encoding GFP or GFP-tagged Exo84 fragments and cultured for 48 h before immunostaining for GFP and the axonal marker tau-1. Representative confocal images of neurons nucleofected with the indicated constructs. Most of GFP-labelled control neurons extend a tau-1-positive axon (top row). Expression of GFP-tagged Exo84 INT-frag interacting with Par6-PDZ impairs axonal specification, causing cells to extend minor neurites negative for tau-1 (middle row). Expression of Exo84 INT-frag-mt unable to bind Par6 does not affect neuronal polarization (bottom row). Arrowheads indicate neurons shown at higher magnification in the insets. Bar, 50  $\mu$ m. (C) Quantitative analysis of neuronal polarization. Mean  $\pm$  SEM; \*\*\* $p < 0.001$ ;  $n = 3$  independent experiments.
